# Supplementary material for: Synthesis, Isolation, Identification and Characterization of a Drug-Excipient Interaction Degradation Impurity in Pramipexole by HPLC, LC/MS and NMR
Source: MDPI journal article supplement (doi:10.3390/separations10010007), 2022-12-22
Supplement: s1 [file s1]

# Synthesis, isolation, identification and characterization of a drug-excipient interaction degradation impurity in pramipexole by HPLC, LC/MS and NMR

## 1. Supplementary Tables:

**Table S1:** Unit composition of pramipexole dihydrochloride extended-release tablets.

| #.                      | ingredients                             | Reference      | Qty/Tablet (mg) |       |       |       |       |       |       |
|-------------------------|-----------------------------------------|----------------|-----------------|-------|-------|-------|-------|-------|-------|
|                         |                                         |                | 0.375           | 0.75  | 1.5   | 2.25  | 3.0   | 3.75  | 4.5   |
| Dry Mixing              |                                         |                |                 |       |       |       |       |       |       |
| 1.                      | Pramipexole dihydrochloride monohydrate | USP            | 0.375           | 0.75  | 1.5   | 2.25  | 3.0   | 3.75  | 4.5   |
| 2.                      | Mannitol                                | USPNF/Ph. Eur. | 12.025          | 11.65 | 10.9  | 10.15 | 9.4   | 11.75 | 14.1  |
| 3.                      | Hypromellose                            | USPNF/Ph. Eur. | 126             | 126   | 126   | 126   | 126   | 157.5 | 189   |
| 4.                      | Pregelatinized Starch                   | USPNF/Ph. Eur. | 129.2           | 129.2 | 129.2 | 129.2 | 129.2 | 161.5 | 193.8 |
| 5.                      | Carbomer homopolymer                    | USPNF/Ph. Eur. | 10              | 10    | 10    | 10    | 10    | 12.5  | 15    |
| 6.                      | Colloidal Silicon Dioxide               | USPNF/Ph. Eur. | 1               | 1     | 1     | 1     | 1     | 1.25  | 1.5   |
| Lubrication             |                                         |                |                 |       |       |       |       |       |       |
| 7.                      | Magnesium Stearate                      | USPNF/Ph. Eur. | 1.4             | 1.4   | 1.4   | 1.4   | 1.4   | 1.75  | 2.1   |
| Un-coated Tablet Weight |                                         |                | 280             | 280   | 280   | 280   | 280   | 350   | 420   |

## 2. Supplementary Figures:

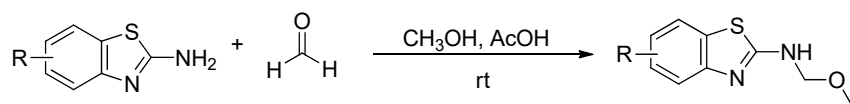

R = -H, 4-OCH<sub>3</sub>, 4-Cl, 6-CH<sub>3</sub>, 6-OCH<sub>3</sub>, 6-OCH<sub>2</sub>CH<sub>3</sub>, 6-F, 6-Cl, 6-Br or 6-NO<sub>2</sub>

**Figure S1:** Synthesis of *N*-(methoxymethyl)benzothiazole reported by Z. Ji et al. / Bioorg. Med. Chem. Lett. 25 (2015) 4065–4068

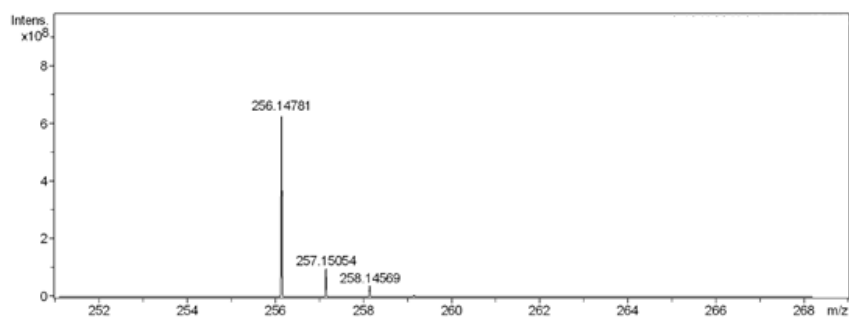

**Figure S2:** High-Resolution MS spectrum of the synthesized impurity.

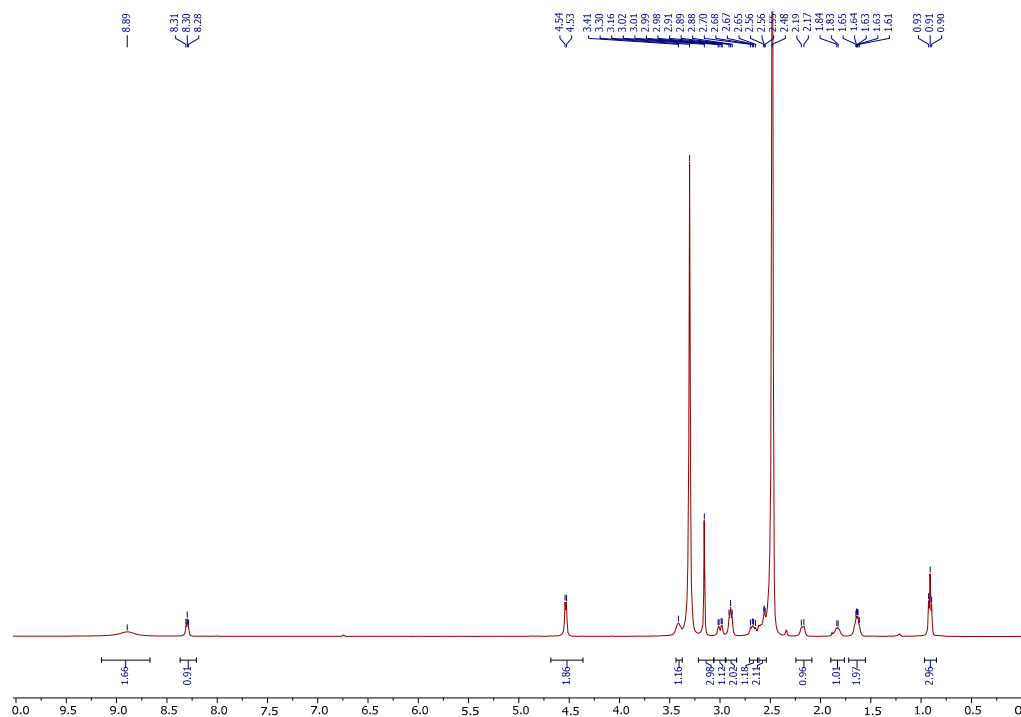

**Figure S3:**  $^1\text{H}$ -NMR spectrum (in  $\text{DMSO}-d_6$ ) of the synthesized impurity.

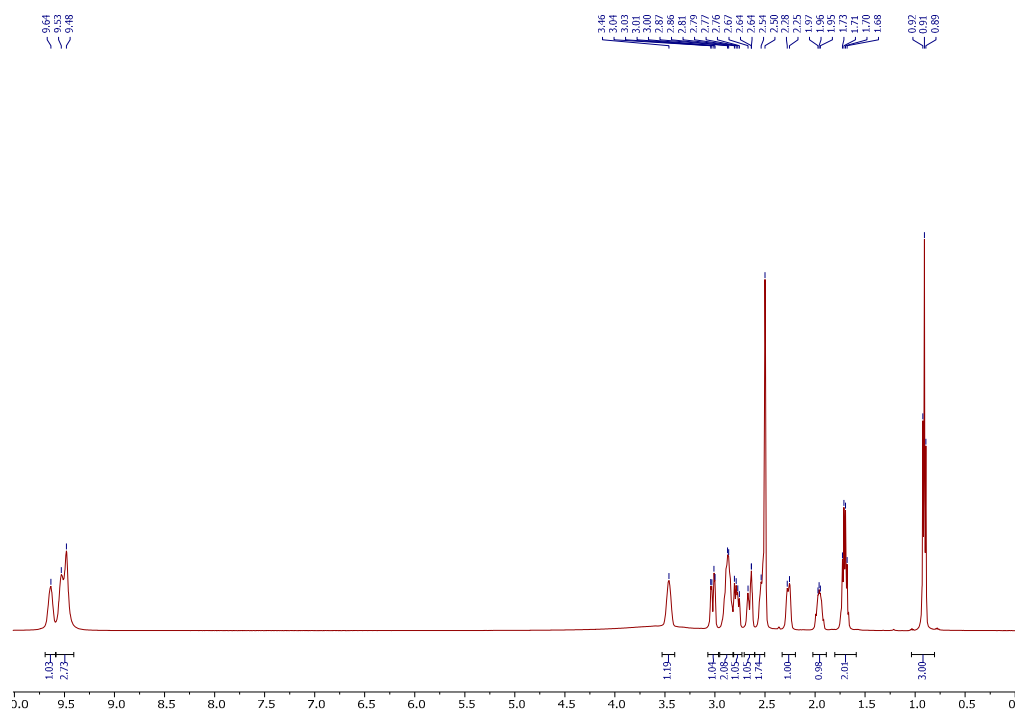

**Figure S4:**  $^1\text{H}$ -NMR spectrum (in  $\text{DMSO}-d_6$ ) of the pramipexole API.

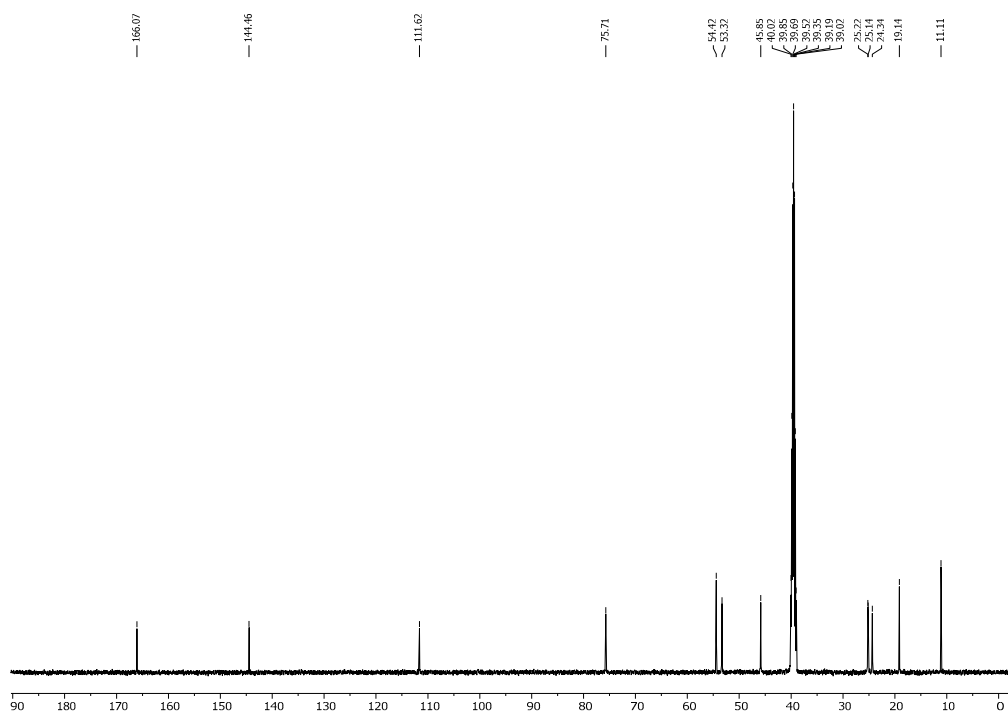

**Figure S5:**  $^{13}\text{C}$  NMR spectrum (in  $\text{DMSO-}d_6$ ) of the synthesized impurity.

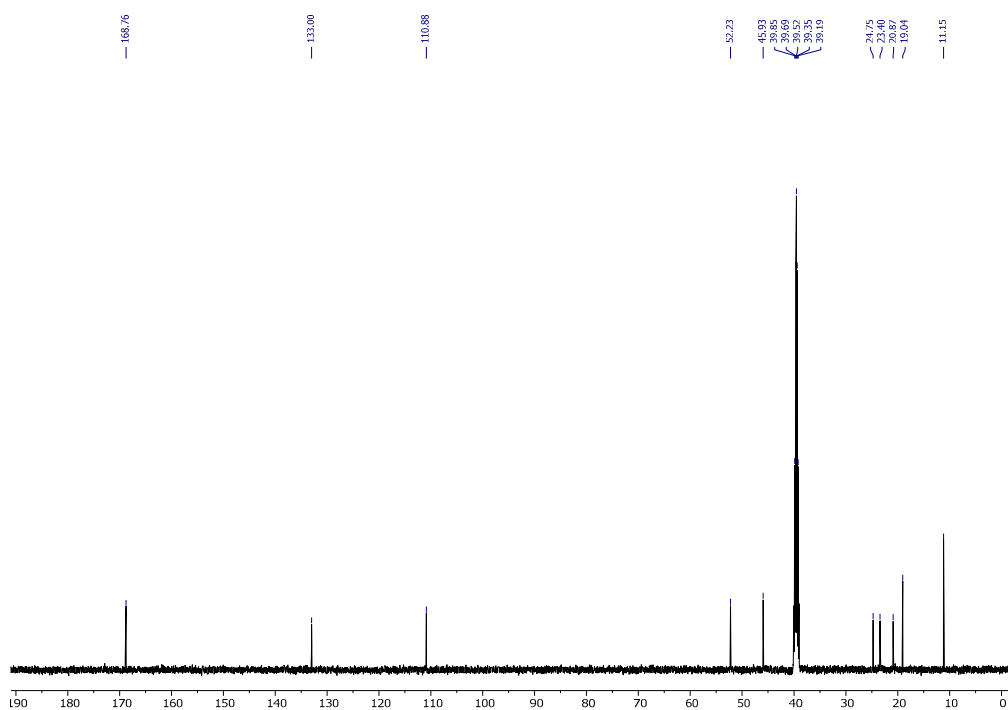

**Figure S6:**  $^{13}\text{C}$  NMR spectrum (in  $\text{DMSO-}d_6$ ) of the pramipexole API.

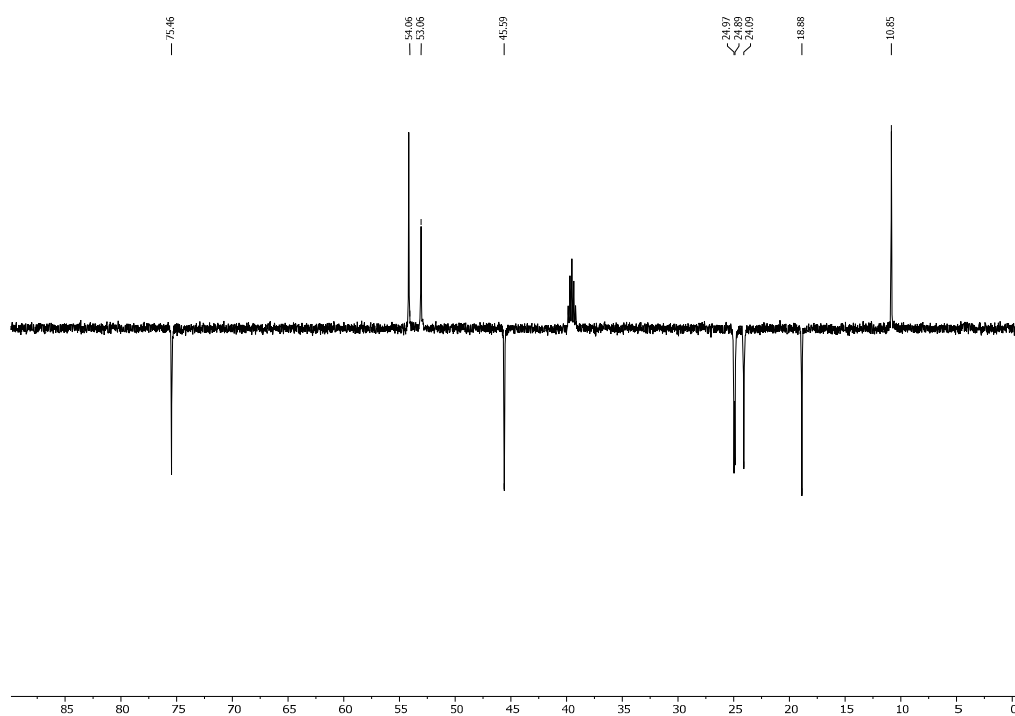

**Figure S7:** DEPT-135 spectrum of the synthesized impurity.

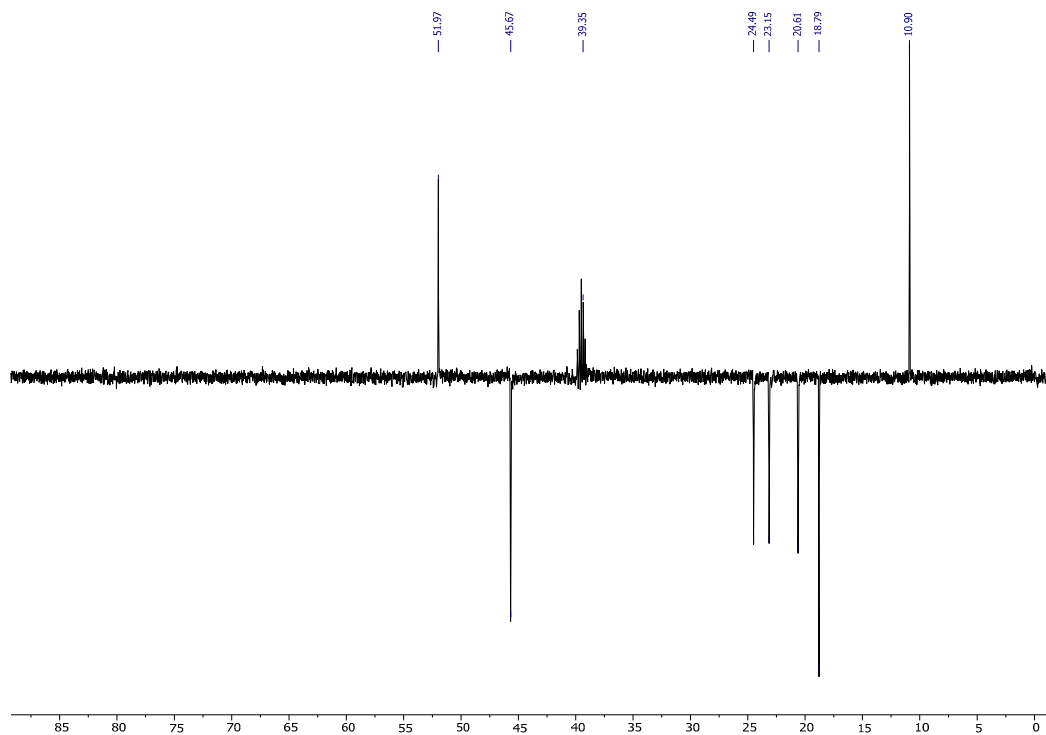

**Figure S8:** DEPT-135 spectrum of the pramipexole API.

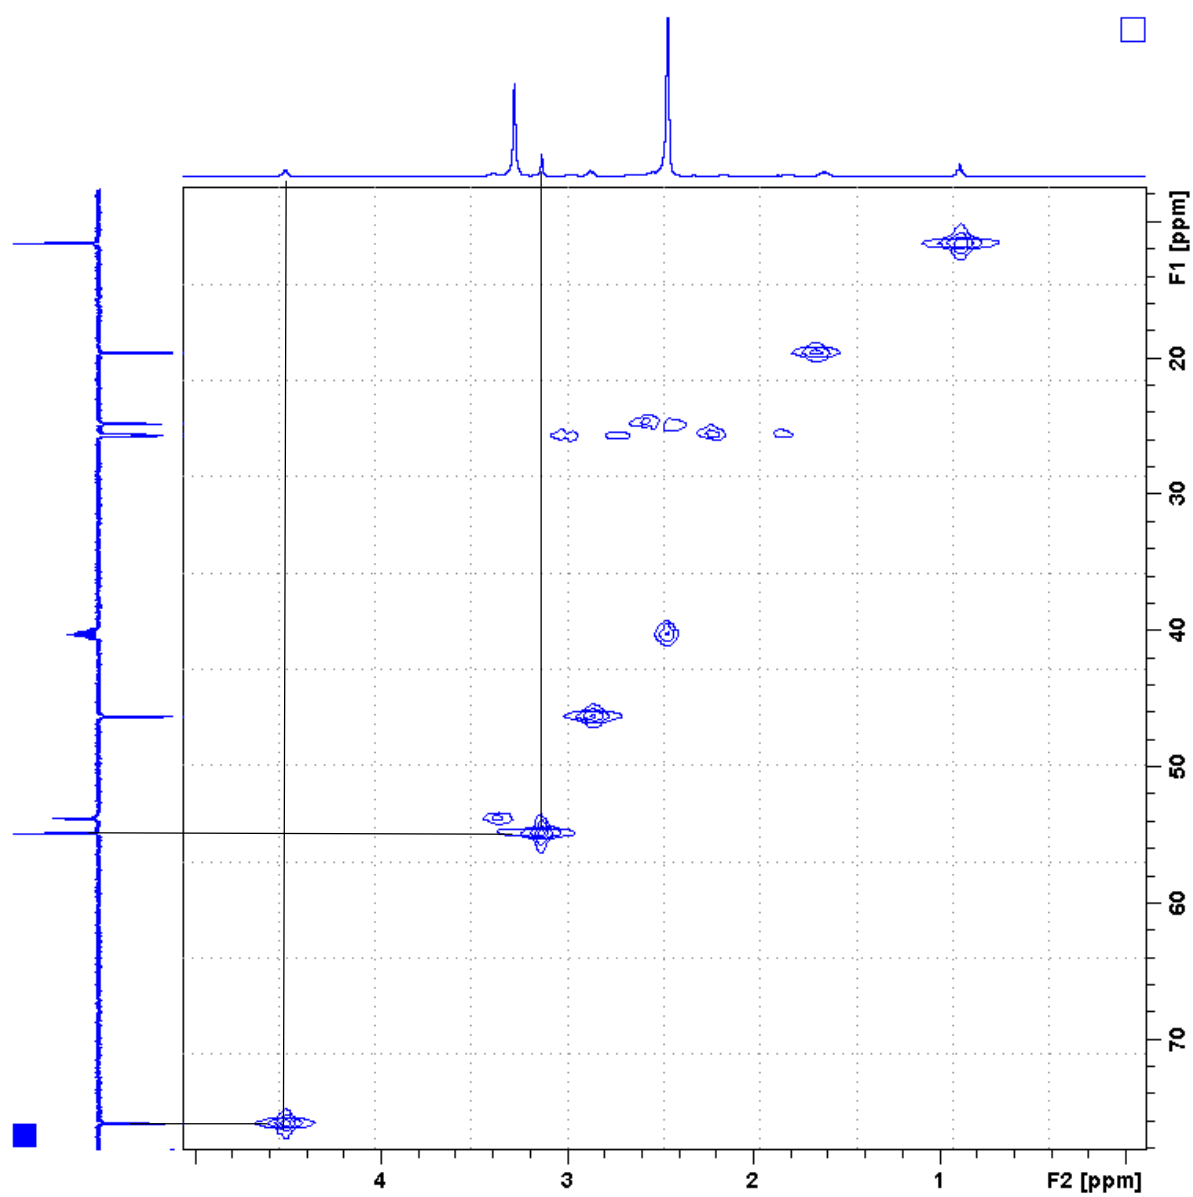

**Figure S9:** HMQC spectrum of the synthesized impurity.

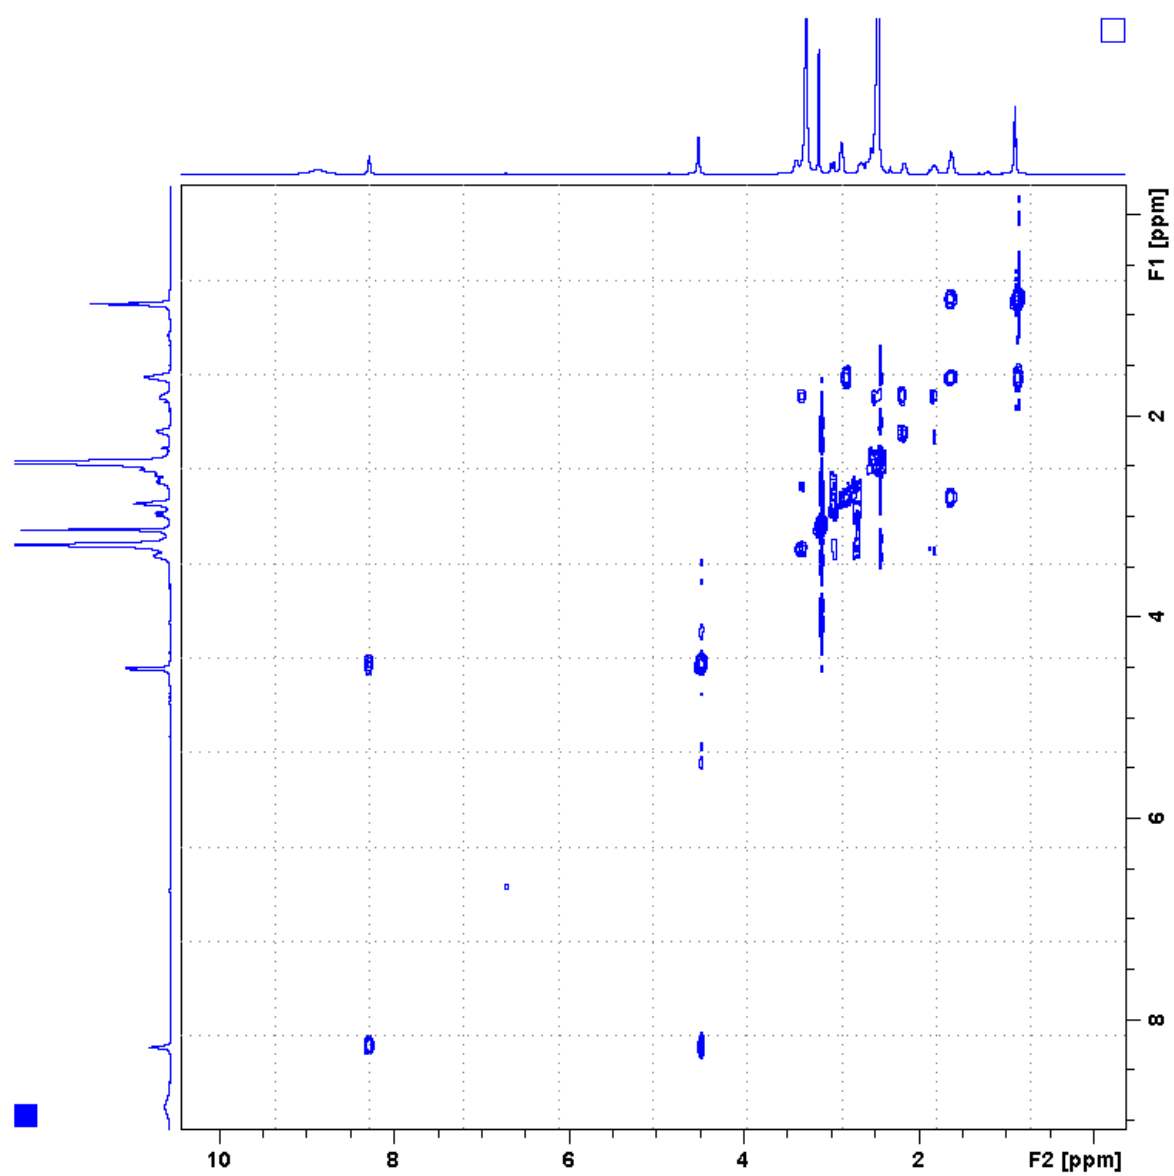

**Figure S10:** COSY spectrum of the synthesized impurity.

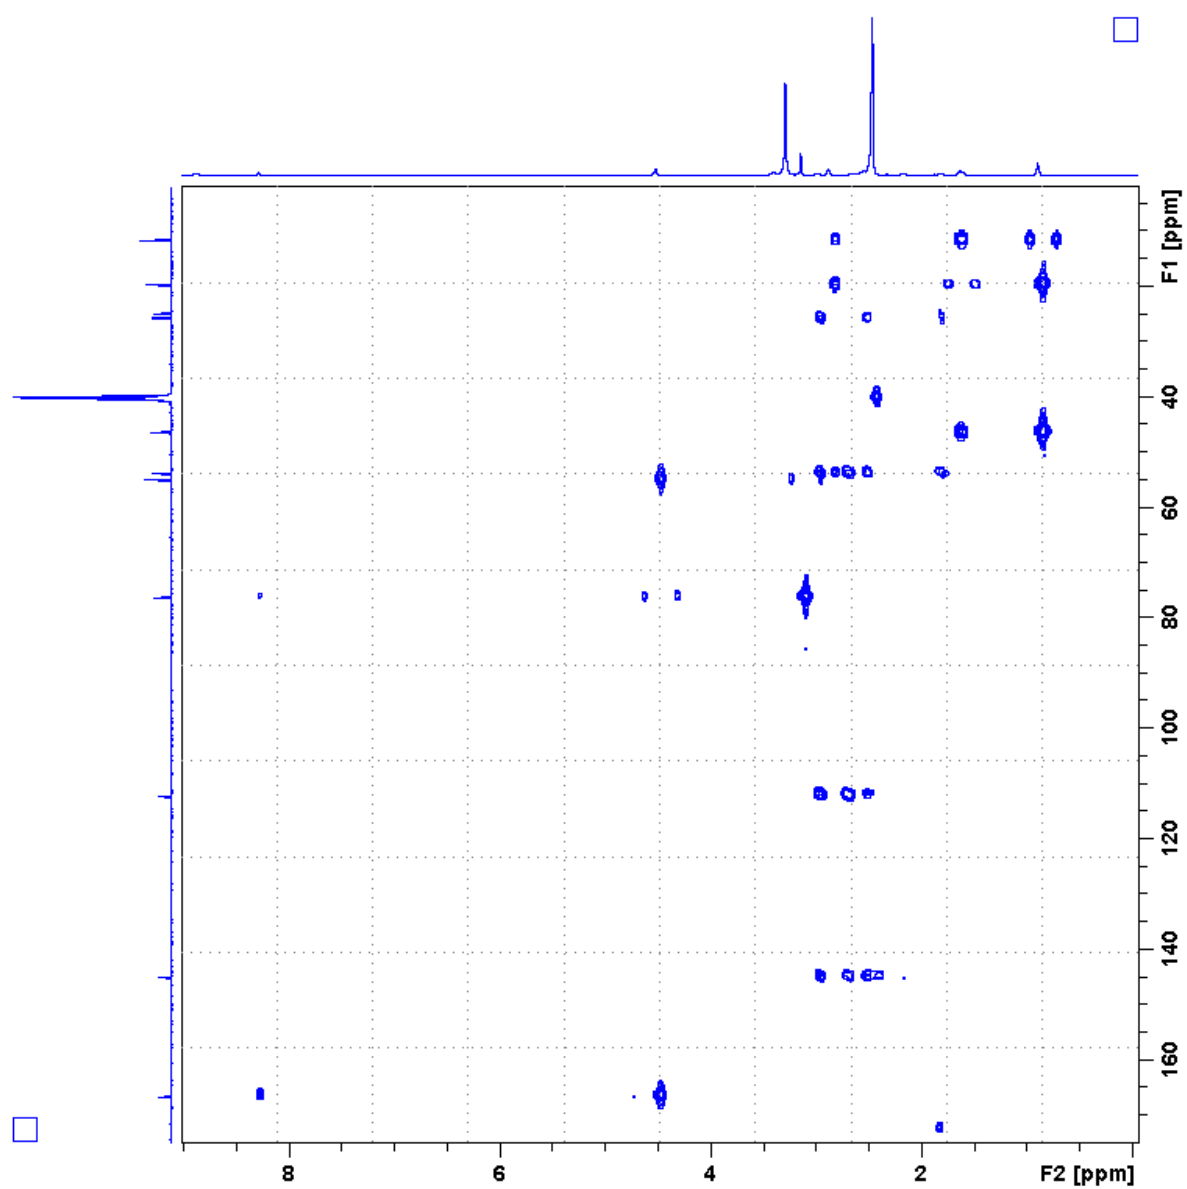

**Figure S11:** HMBC spectrum of the synthesized impurity.



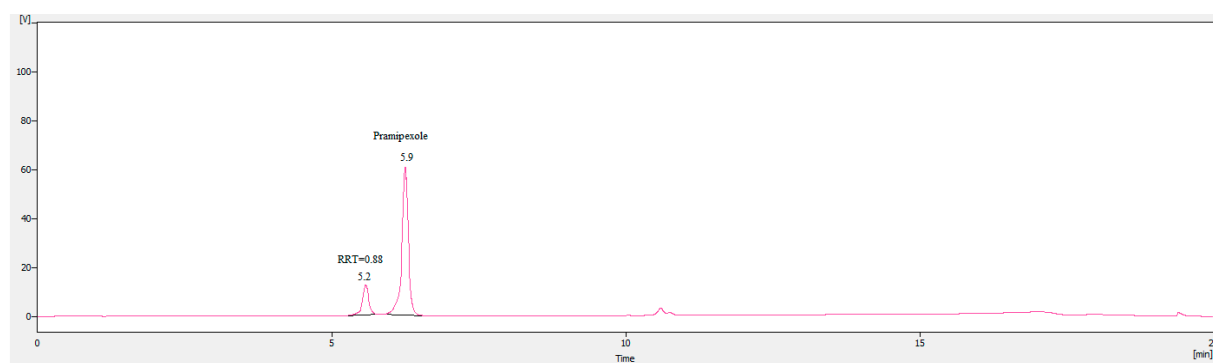

**Figure S12:** HPLC-UV chromatograms using organic impurity test method in USP monograph of pramipexole corresponding to injection of reaction mixture of HPMC and pramipexole in presence of formaldehyde; temperature: 120°C; time: 2 h.
